# Supplementary material for: Parallel metatranscriptome analyses of host and symbiont gene expression in the gut of the termite Reticulitermes flavipes
Source: Springer Nature journal article supplement (doi:10.1186/1754-6834-2-25), 2009-10-15
Supplement: Additional file 1 [file 1754-6834-2-25-s1.doc]

**Table S1. Carbohydrate active genes, gut (host) library.**

Table S1. Continued.

Table S1. Continued.

Table S1. Continued.

Table S1. Continued.
