# Supplementary material for: Parallel metatranscriptome analyses of host and symbiont gene expression in the gut of the termite Reticulitermes flavipes
Source: Springer Nature journal article supplement (doi:10.1186/1754-6834-2-25), 2009-10-15
Supplement: Additional file 6 [file 1754-6834-2-25-s6.doc]

**Table S6. Candidate lignase, detoxification and antioxidant genes, gut (host) library.**
